## Correction: Lyophilized human cells stored at room temperature preserve multiple RNA species at excellent quality for RNA sequencing

Lilla Ozgyin<sup>1</sup>, Attila Horvath<sup>1,2</sup> and Balint Laszlo Balint<sup>1</sup>

<sup>1</sup> Department of Biochemistry and Molecular Biology, Genomic Medicine and Bioinformatic Core Facility, Faculty of Medicine, University of Debrecen, Debrecen H-4012, Hungary

<sup>2</sup> Department of Biochemistry and Molecular Biology, Nuclear Hormone Receptor Research Laboratory, Faculty of Medicine, University of Debrecen, Debrecen H-4012, Hungary

**Published:** November 09, 2018

**Copyright:** Ozgyin et al. This is an open-access article distributed under the terms of the Creative Commons Attribution License 3.0 (CC BY 3.0), which permits unrestricted use, distribution, and reproduction in any medium, provided the original author and source are credited.

**This article has been corrected:** The correct affiliations information is given below:

<sup>1</sup> Department of Biochemistry and Molecular Biology, Genomic Medicine and Bioinformatic Core Facility, Faculty of Medicine, University of Debrecen, Debrecen H-4012, Hungary

<sup>2</sup> Department of Biochemistry and Molecular Biology, Nuclear Hormone Receptor Research Laboratory, Faculty of Medicine, University of Debrecen, Debrecen H-4012, Hungary

Original article: Oncotarget. 2018; 9:31312-31329. <https://doi.org/10.18632/oncotarget.25764>
